# Supplementary material for: Porous glass beads as a new adsorbent to remove sulfur-containing compounds
Source: Royal Society of Chemistry journal article supplement (doi:10.1039/c2gc16559g), 2012-01-01
Supplement: c2gc16559g.pdf [file c2gc16559g.pdf]

## Supporting information

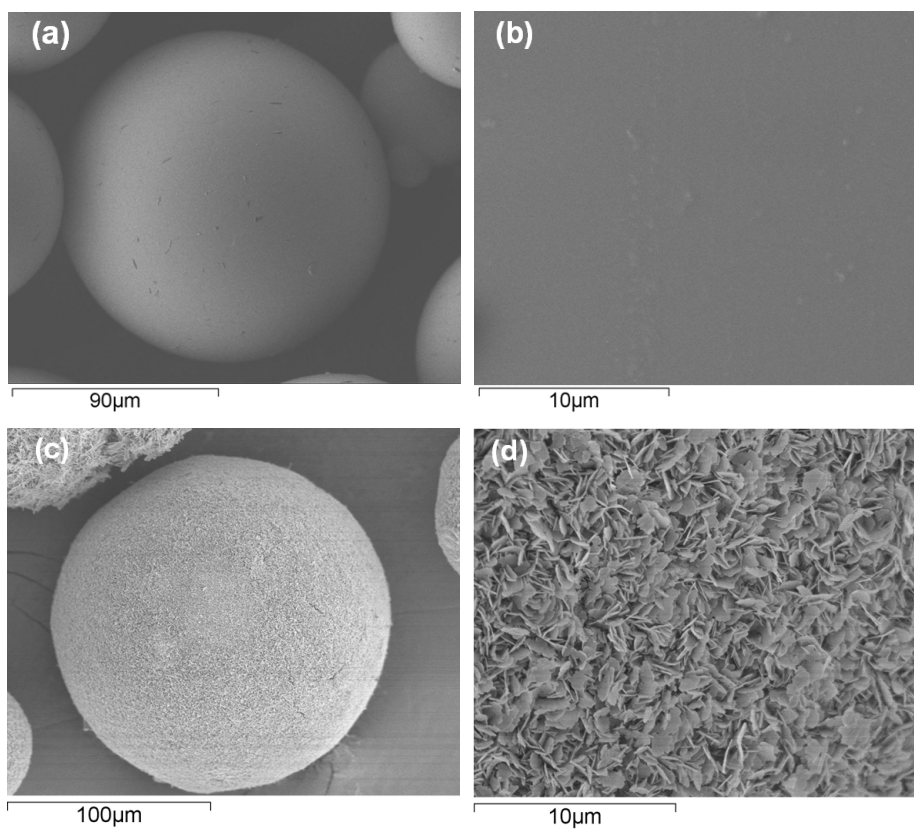

Fig. 1 Surface morphology of glass beads before and after the subcritical water treatment

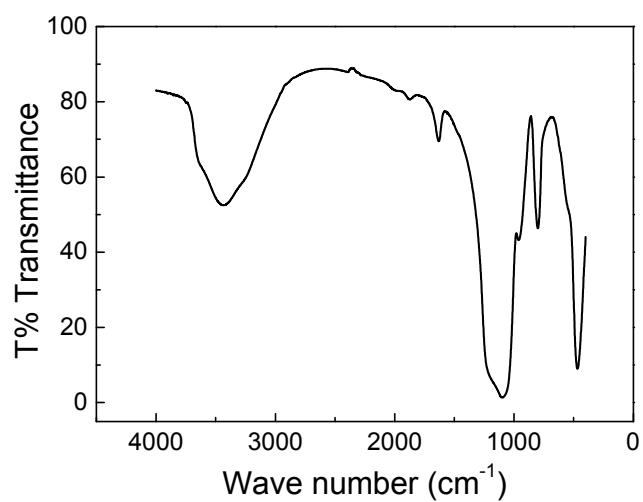

Fig. 2 FT-IR spectra of SiO<sub>2</sub> microspheres

Table 1. Comparison of the cost of different adsorbents

| Adsorbent     | Glass beads | Activated carbon | SiO <sub>2</sub> -Al <sub>2</sub> O <sub>3</sub> | Activated alumina |
|---------------|-------------|------------------|--------------------------------------------------|-------------------|
| Price (RMB/t) | 2000-3000   | 6000-14000       | 4000-20000                                       | 5500-10000        |
